# Supplementary material for: Saffold Virus Exploits Integrin αVβ8 and Sulfated Glycosaminoglycans as Two Parallel Receptors for Infection
Source: Research Square preprint supplement (doi:10.21203/rs.3.rs-5450276/v1), 2025-03-20
Supplement: Supplementary file 1 [file 38c46bea36b5d6399a400817.pdf]

## Reporting Summary

Nature Portfolio wishes to improve the reproducibility of the work that we publish. This form provides structure for consistency and transparency in reporting. For further information on Nature Portfolio policies, see our [Editorial Policies](#) and the [Editorial Policy Checklist](#).

### Statistics

For all statistical analyses, confirm that the following items are present in the figure legend, table legend, main text, or Methods section.

n/a Confirmed

- |                                     |                                     |                                                                                                                                                                                                                                                            |
|-------------------------------------|-------------------------------------|------------------------------------------------------------------------------------------------------------------------------------------------------------------------------------------------------------------------------------------------------------|
| <input type="checkbox"/>            | <input checked="" type="checkbox"/> | The exact sample size ( $n$ ) for each experimental group/condition, given as a discrete number and unit of measurement                                                                                                                                    |
| <input type="checkbox"/>            | <input checked="" type="checkbox"/> | A statement on whether measurements were taken from distinct samples or whether the same sample was measured repeatedly                                                                                                                                    |
| <input type="checkbox"/>            | <input checked="" type="checkbox"/> | The statistical test(s) used AND whether they are one- or two-sided<br><i>Only common tests should be described solely by name; describe more complex techniques in the Methods section.</i>                                                               |
| <input checked="" type="checkbox"/> | <input type="checkbox"/>            | A description of all covariates tested                                                                                                                                                                                                                     |
| <input checked="" type="checkbox"/> | <input type="checkbox"/>            | A description of any assumptions or corrections, such as tests of normality and adjustment for multiple comparisons                                                                                                                                        |
| <input type="checkbox"/>            | <input checked="" type="checkbox"/> | A full description of the statistical parameters including central tendency (e.g. means) or other basic estimates (e.g. regression coefficient) AND variation (e.g. standard deviation) or associated estimates of uncertainty (e.g. confidence intervals) |
| <input type="checkbox"/>            | <input checked="" type="checkbox"/> | For null hypothesis testing, the test statistic (e.g. $F$ , $t$ , $r$ ) with confidence intervals, effect sizes, degrees of freedom and $P$ value noted<br><i>Give <math>P</math> values as exact values whenever suitable.</i>                            |
| <input checked="" type="checkbox"/> | <input type="checkbox"/>            | For Bayesian analysis, information on the choice of priors and Markov chain Monte Carlo settings                                                                                                                                                           |
| <input checked="" type="checkbox"/> | <input type="checkbox"/>            | For hierarchical and complex designs, identification of the appropriate level for tests and full reporting of outcomes                                                                                                                                     |
| <input checked="" type="checkbox"/> | <input type="checkbox"/>            | Estimates of effect sizes (e.g. Cohen's $d$ , Pearson's $r$ ), indicating how they were calculated                                                                                                                                                         |

Our web collection on [statistics for biologists](#) contains articles on many of the points above.

### Software and code

Policy information about [availability of computer code](#)

Data collection

No software was used.

Data analysis

GraphPad Prism software program version 7,  
ImageJ software program version 1.48,  
WinMDI software program version 2.9,  
Prinseq software program, version 0.20.4,  
TIDE version 3.3.0

For manuscripts utilizing custom algorithms or software that are central to the research but not yet described in published literature, software must be made available to editors and reviewers. We strongly encourage code deposition in a community repository (e.g. GitHub). See the Nature Portfolio [guidelines for submitting code & software](#) for further information.

## Data

Policy information about [availability of data](#)

All manuscripts must include a [data availability statement](#). This statement should provide the following information, where applicable:

- Accession codes, unique identifiers, or web links for publicly available datasets
- A description of any restrictions on data availability
- For clinical datasets or third party data, please ensure that the statement adheres to our [policy](#)

Genome sequences of JPN08-404 strain (GenBank accession no. HQ902242), 987/Niigata/2007 (GenBank accession no. LC460463), and 1801-Yamagata-2009 (GenBank accession no. LC026126) can be accessed through the NCBI Nucleotide database.

JPN08-356 strain is an unregistered clinical isolate.

GenBank accession numbers are as follows:

Human SLC35B2, NM\_178148  
 Hamster SLC35B2, XP\_005072381.1  
 Human EXT1, NM\_000127.3  
 Human ITGAV, NP\_002201.2  
 Human ITGB8, NM\_002214.3  
 Mouse ITGB8, NM\_177290.4  
 Hamster ITGB8, XM\_005084467  
 Human ITGB1, NM\_002211.4  
 Human ITGB3, NM\_000212.3  
 Human ITGB5, NM\_002213.5  
 Human ITGB6, NM\_000888.5

## Research involving human participants, their data, or biological material

Policy information about studies with [human participants or human data](#). See also policy information about [sex, gender \(identity/presentation\), and sexual orientation](#) and [race, ethnicity and racism](#).

|                                                                    |                |
|--------------------------------------------------------------------|----------------|
| Reporting on sex and gender                                        | Not applicable |
| Reporting on race, ethnicity, or other socially relevant groupings | Not applicable |
| Population characteristics                                         | Not applicable |
| Recruitment                                                        | Not applicable |
| Ethics oversight                                                   | Not applicable |

Note that full information on the approval of the study protocol must also be provided in the manuscript.

## Field-specific reporting

Please select the one below that is the best fit for your research. If you are not sure, read the appropriate sections before making your selection.

☒ Life sciences ☐ Behavioural & social sciences ☐ Ecological, evolutionary & environmental sciences

For a reference copy of the document with all sections, see [nature.com/documents/nr-reporting-summary-flat.pdf](https://www.nature.com/documents/nr-reporting-summary-flat.pdf)

## Life sciences study design

All studies must disclose on these points even when the disclosure is negative.

|                 |                                                                                                                                                                                     |
|-----------------|-------------------------------------------------------------------------------------------------------------------------------------------------------------------------------------|
| Sample size     | Sample sizes were estimated on the basis of previous studies using similar methods, see Yamayoshi et al. (DOI: 10.1038/nm.1992); Watanabe et al. (DOI: 10.1038/s41467-023-37399-8.) |
| Data exclusions | No data were excluded from the analyses.                                                                                                                                            |
| Replication     | All experiments were repeated at least twice and yielded similar results.                                                                                                           |
| Randomization   | Not relevant to this study, since samples were not allocated into experimental groups.                                                                                              |
| Blinding        | No blinding was performed in this study, because there is no clinical data or field sample collection.                                                                              |

# Reporting for specific materials, systems and methods

We require information from authors about some types of materials, experimental systems and methods used in many studies. Here, indicate whether each material, system or method listed is relevant to your study. If you are not sure if a list item applies to your research, read the appropriate section before selecting a response.

## Materials & experimental systems

| n/a                                 | Involved in the study                                     |
|-------------------------------------|-----------------------------------------------------------|
| <input type="checkbox"/>            | <input checked="" type="checkbox"/> Antibodies            |
| <input type="checkbox"/>            | <input checked="" type="checkbox"/> Eukaryotic cell lines |
| <input checked="" type="checkbox"/> | <input type="checkbox"/> Palaeontology and archaeology    |
| <input checked="" type="checkbox"/> | <input type="checkbox"/> Animals and other organisms      |
| <input checked="" type="checkbox"/> | <input type="checkbox"/> Clinical data                    |
| <input checked="" type="checkbox"/> | <input type="checkbox"/> Dual use research of concern     |
| <input checked="" type="checkbox"/> | <input type="checkbox"/> Plants                           |

## Methods

| n/a                                 | Involved in the study                              |
|-------------------------------------|----------------------------------------------------|
| <input checked="" type="checkbox"/> | <input type="checkbox"/> ChIP-seq                  |
| <input type="checkbox"/>            | <input checked="" type="checkbox"/> Flow cytometry |
| <input checked="" type="checkbox"/> | <input type="checkbox"/> MRI-based neuroimaging    |

## Antibodies

### Antibodies used

Biotinylated mouse anti-heparan sulfate antibody (10E4 epitope) (370255-B, amsbio)  
 Biotinylated mouse IgMk Isotype control (401621, BioLegend)  
 PE-streptavidin (405203, BioLegend)  
 PE-conjugated antibodies against CD51 (integrin  $\alpha$ V) (327910, BioLegend)  
 CD29 (integrin  $\beta$ 1) (303003, BioLegend)  
 CD61 (integrin  $\beta$ 3) (336405, BioLegend)  
 Integrin  $\beta$ 5 (345203, BioLegend)  
 APC-conjugated antibody against integrin  $\beta$ 6 (FAB4155A, R&D Systems)  
 PE-conjugated mouse IgG1k (981804, BioLegend) isotype  
 PE-conjugated IgG2ak (400213, BioLegend) isotype  
 Rabbit anti-integrin  $\alpha$ V $\beta$ 8 (clone EM13309) (ZRB1192, Sigma Aldrich)  
 PE-conjugated donkey anti-rabbit IgG secondary antibody (406421, BioLegend)  
 Rabbit Polyclonal Isotype antibody (910801, BioLegend)  
 Rabbit anti-Integrin  $\alpha$ V polyclonal antibody (27096-1-AP, Proteintech)  
 Rabbit anti-integrin  $\beta$ 8 (D1V7M) monoclonal antibody (88300, Cell Signaling Technology)  
 Rabbit anti-integrin  $\alpha$ V $\beta$ 3 monoclonal antibody (clone EM22703), (ZRB1190, Sigma-Aldrich)  
 mouse anti-actin (AC-40) monoclonal antibody (A3853, Sigma Aldrich)  
 horseradish peroxidase-conjugated anti-mouse IgG (170-6516, Bio-Rad Laboratories)  
 horseradish peroxidase-conjugated anti-rabbit IgG (170-6515, Bio-Rad Laboratories)  
 rabbit anti-SAFV-3 antiserum

### Validation

Commercial antibodies were validated by the suppliers, we refer to the information on the supplier's websites.  
 Rabbit anti-SAFV-3 antiserum was used in our previous study (Himeda et al. doi:10.1371/ journal.pone.0053194).

## Eukaryotic cell lines

Policy information about [cell lines and Sex and Gender in Research](#)

### Cell line source(s)

HeLa-R RIKEN BRC (RCB0007) (DOI: 10.1371/journal.pone.0053194)  
 HeLa-N (DOI: 10.1371/journal.pone.0053194)  
 293T (DOI: 10.1128/JVI.00532-07)  
 BHK-21 (DOI: 10.1128/JVI.02385-08)  
 BHK-21 (C-13) JCRB Cell Bank (JCRB9020)  
 Caco-2 (DOI: 10.3201/eid1306.060896)  
 RD-18S-Niigata (DOI: 10.1002/jmv.24928)

### Authentication

HeLa-N and HeLa-R cell lines were authenticated by STR analysis (DOI: 10.1371/journal.pone.0053194).  
 Other cell lines were not authenticated.

### Mycoplasma contamination

All cell lines were not tested for mycoplasma contamination.

### Commonly misidentified lines (See [ICLAC](#) register)

No commonly misidentified cell lines were used.

## Plants

|                       |                                                                                                                                                                                                                                                                                                                                                                                                                                                                                                                                                   |
|-----------------------|---------------------------------------------------------------------------------------------------------------------------------------------------------------------------------------------------------------------------------------------------------------------------------------------------------------------------------------------------------------------------------------------------------------------------------------------------------------------------------------------------------------------------------------------------|
| Seed stocks           | Report on the source of all seed stocks or other plant material used. If applicable, state the seed stock centre and catalogue number. If plant specimens were collected from the field, describe the collection location, date and sampling procedures.                                                                                                                                                                                                                                                                                          |
| Novel plant genotypes | Describe the methods by which all novel plant genotypes were produced. This includes those generated by transgenic approaches, gene editing, chemical/radiation-based mutagenesis and hybridization. For transgenic lines, describe the transformation method, the number of independent lines analyzed and the generation upon which experiments were performed. For gene-edited lines, describe the editor used, the endogenous sequence targeted for editing, the targeting guide RNA sequence (if applicable) and how the editor was applied. |
| Authentication        | Describe any authentication procedures for each seed stock used or novel genotype generated. Describe any experiments used to assess the effect of a mutation and, where applicable, how potential secondary effects (e.g. second site T-DNA insertions, mosaicism, off-target gene editing) were examined.                                                                                                                                                                                                                                       |

## Flow Cytometry

### Plots

Confirm that:

- ☐ The axis labels state the marker and fluorochrome used (e.g. CD4-FITC).
- ☐ The axis scales are clearly visible. Include numbers along axes only for bottom left plot of group (a 'group' is an analysis of identical markers).
- ☐ All plots are contour plots with outliers or pseudocolor plots.
- ☐ A numerical value for number of cells or percentage (with statistics) is provided.

### Methodology

|                           |                                                                                                                                                                                                                                                                                                                                                                                                                                               |
|---------------------------|-----------------------------------------------------------------------------------------------------------------------------------------------------------------------------------------------------------------------------------------------------------------------------------------------------------------------------------------------------------------------------------------------------------------------------------------------|
| Sample preparation        | ~500,000 cells were harvested using Accutase (Nacalai Tesque) and washed in FACS buffer (PBS + 3% FCS). The cells were incubated with primary antibodies for 30 minutes on ice. Cells were washed in FACS buffer and subsequently incubated in secondary antibodies for 30 minutes on ice, if required. Cells were washed and resuspend in FACS buffer. Samples were analyzed using a FACS Canto II (BD Biosciences) and the WinMDI software. |
| Instrument                | FACS Canto II (BD Biosciences)                                                                                                                                                                                                                                                                                                                                                                                                                |
| Software                  | WinMDI software version 2.9                                                                                                                                                                                                                                                                                                                                                                                                                   |
| Cell population abundance | N/A                                                                                                                                                                                                                                                                                                                                                                                                                                           |
| Gating strategy           | Living cells were gated based on SSC-A vs. FSC-A plot. Negative controls were prepared using isotype controls or without antibody.                                                                                                                                                                                                                                                                                                            |

- ☐ Tick this box to confirm that a figure exemplifying the gating strategy is provided in the Supplementary Information.
